# Supplementary material for: Seasonality of Aerosol Sources Calls for Distinct Air Quality Mitigation Strategies
Source: MDPI journal article supplement (doi:10.3390/toxics10030121), 2022-03-03
Supplement: s1 [file s1]

# Supplementary Materials: Seasonality of Aerosol Sources Calls for Distinct Air Quality Mitigation Strategies

Chunshui Lin, Darius Ceburnis, Colin O'Dowd and Jurgita Ovadnevaite

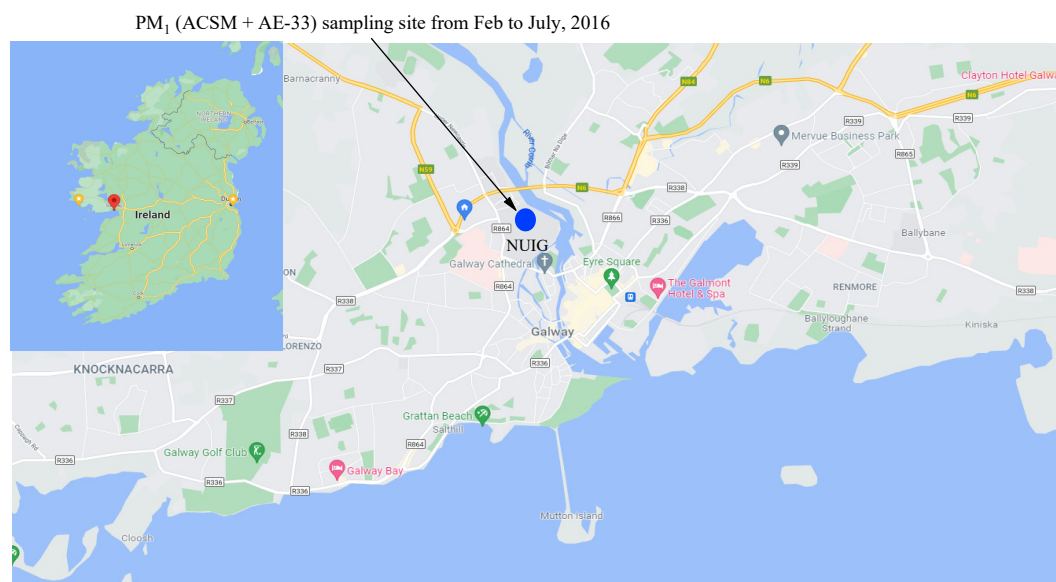

**Figure S1.** Sampling site (© Google Maps) at NUIG in Galway city, on the west coast of Ireland. The map is adapted from Google Maps.

## Free PMF: 5-factor solution

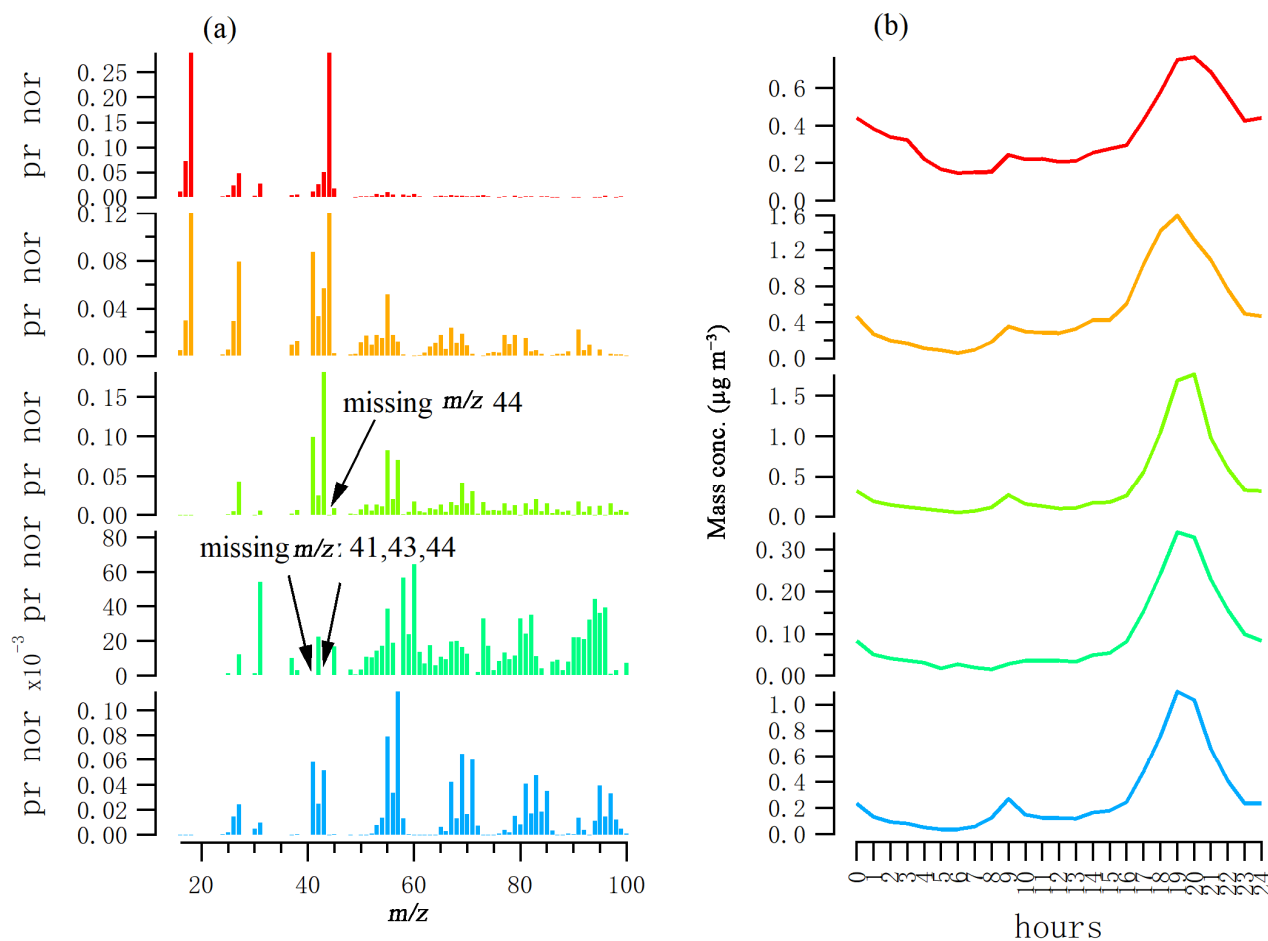

**Figure S2.** Mass spectral profiles for the unconstrained PMF factors (a) and the corresponding time diurnal patterns (b) in winter.

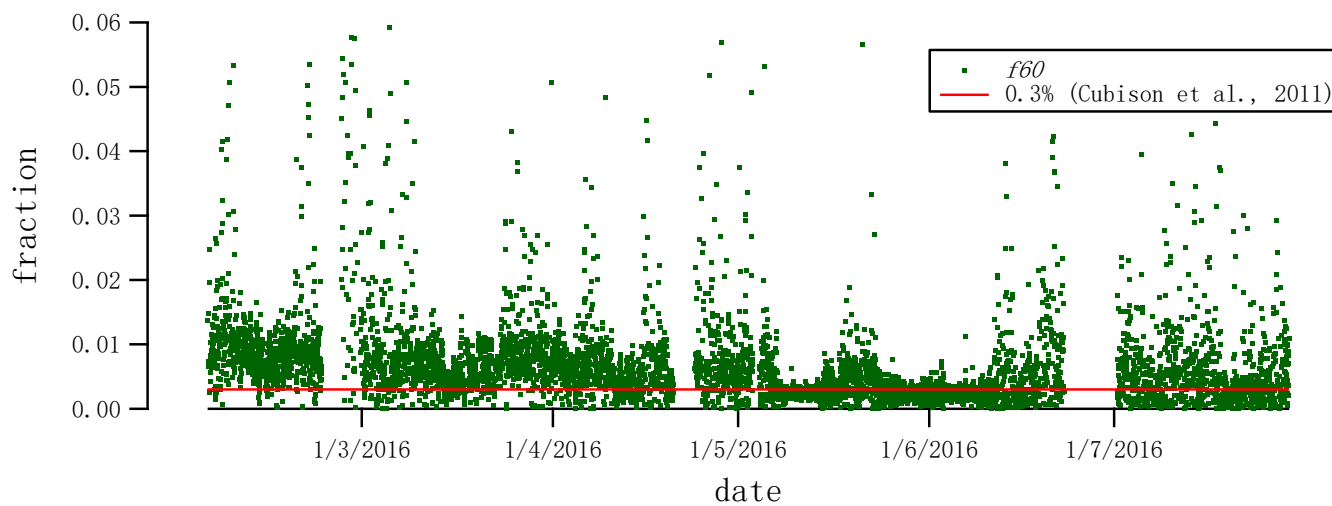

**Figure S3.** Time series of the measured fraction of  $m/z$  60 (i.e.,  $f_{60}$ ) in the total organics. The red line is the reference  $f_{60}$  background from Cubison, *et al.* [1].

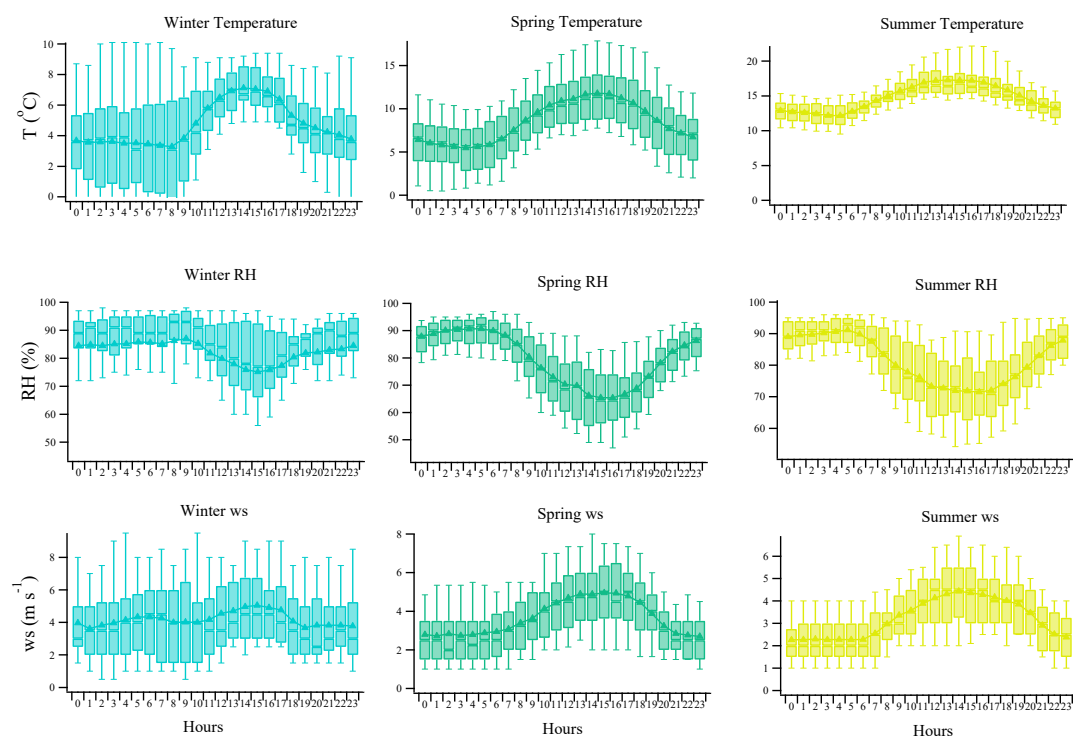

**Figure S4.** Diurnal patterns of the meteorological parameters in different seasons. For the diurnal plot, the triangle is the mean value; the line is the median; box is the 25<sup>th</sup> and 75<sup>th</sup> percentile; and the whisker is the 5<sup>th</sup> and 95<sup>th</sup> percentile.

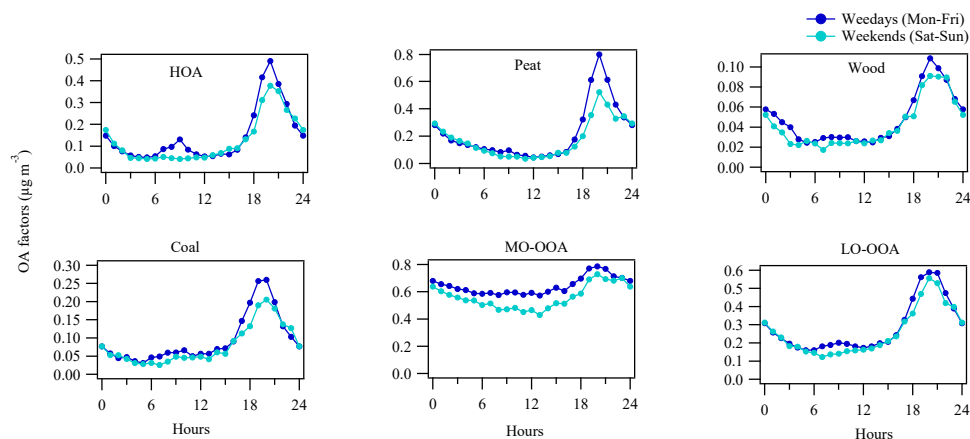

**Figure S5.** Averaged diurnal pattern for the OA factors during weekdays and weekends over the entire period.

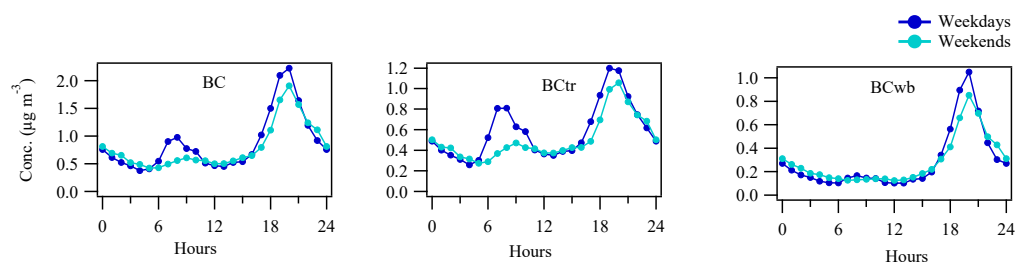

**Figure S6.** Averaged diurnal pattern for BC, and traffic-related BC (BCtr) and wood burning-related BC (BCwb). BCtr and BCwb were apportioned following Sandradewi, *et al.* [2] with Ångström exponent of 1 for traffic and 2 for biomass burning.

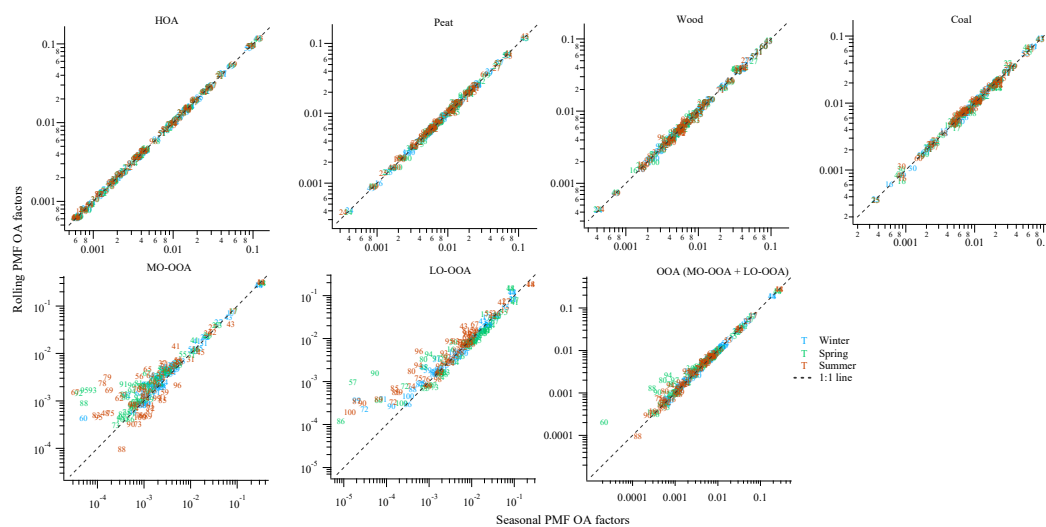

**Figure S7.** Mass spectral profile comparison between the rolling and seasonal PMF (log scale).

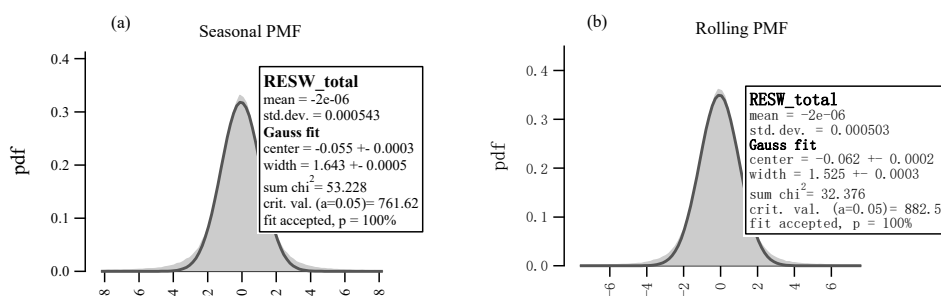

**Figure S8.** Distribution of the scaled residuals over the sampling period for the seasonal PMF (a) and rolling PMF (b).

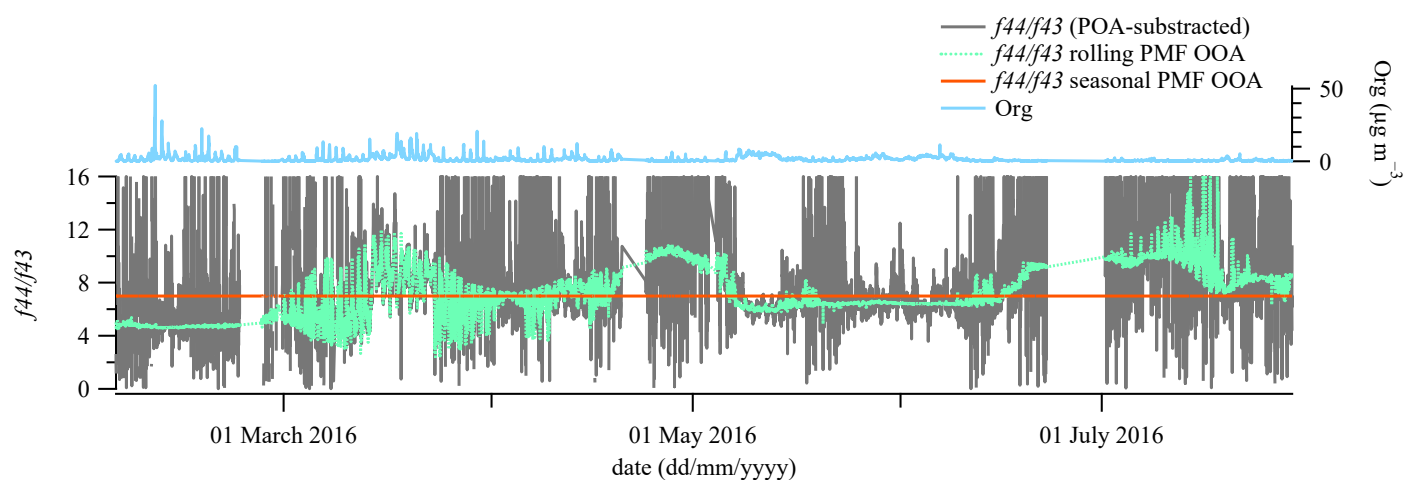

**Figure S9.** Time series of the measured  $f_{44}/f_{43}$  ratios (POA-subtracted) and OOA  $f_{44}/f_{43}$  for the rolling and seasonal PMF. Also shown is the time series of organic aerosol (Org). The large spikes of the  $f_{44}/f_{43}$  were during the periods with low Org concentration (close to detection limit).

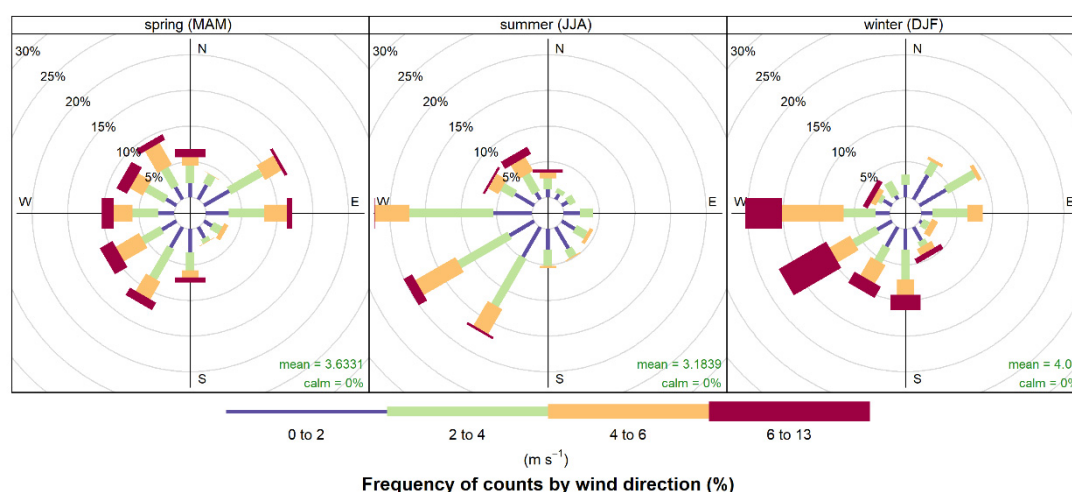

**Figure S10.** Frequency of counts by wind direction in different seasons. The wind rose plots were plotted using openair package with R software (version 4.1.2) [3].

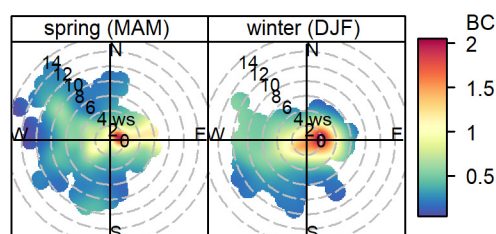

**Figure S11.** Polar plot of BC in spring and winter. The polar plots were plotted using openair package with R software (version 4.1.2) [3].

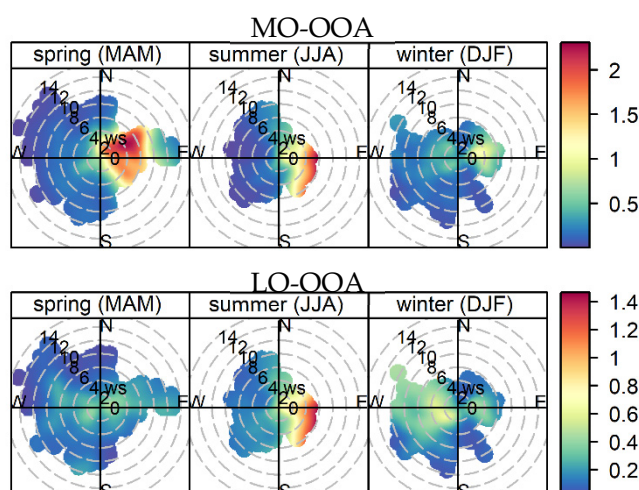

**Figure S12.** Polar plot of MO-OOA and LO-OOA for the seasonal PMF solution. The polar plots were plotted using openair package with R software (version 4.1.2) [3].

**Table S1.** Criterion list for both seasonal and rolling PMF.

| Criterion                                   | Type                                                                    | Threshold      |
|---------------------------------------------|-------------------------------------------------------------------------|----------------|
| HOA vs BC*                                  | R <sup>2</sup> , time series during the morning rush hours (6:00-10:00) | p value ≤ 0.05 |
| HOA + peat + wood + coal vs BC <sup>1</sup> | R <sup>2</sup> , time series during the evening hours (18:00-23:00)     | p value ≤ 0.05 |
| Explained variation $m/z60$ , wood + peat   | Average, normal time series                                             | p value ≤ 0.05 |
| Factor_5 [44] <sup>2</sup>                  | Profiles, fraction, sorting criterion                                   | >0             |
| Factor_5 [43]                               | Profiles, fraction                                                      | >0             |
| Factor_6 [44]                               | Profiles, fraction                                                      | >0             |
| Factor_6 [43]                               | Profiles, fraction                                                      | >0             |

\*<sup>1</sup>BC measurement was only available from 05 February to 09 April 2016. During periods when BC was not available, only the rest of criterion were considered. <sup>2</sup> The criterion with gray background was applied as the sorting criterion for the unconstrained PMF factors

**Table S2.** Comparison of the correlation  $r^2$  between the time series of MO-OOA and LO-OOA apportioned by the rolling PMF and seasonal PMF, as well as external measurements during the summer.

| Correlation $r^2$                       | Rolling PMF | Seasonal PMF |
|-----------------------------------------|-------------|--------------|
| MO-OOA vs. LO-OOA                       | 0.54        | 0.76         |
| MO-OOA vs. SO <sub>4</sub>              | 0.62        | 0.62         |
| LO-OOA vs. NO <sub>3</sub> <sup>1</sup> | 0.27        | 0.40         |
| OOA vs. NH <sub>4</sub>                 | 0.57        | 0.57         |

<sup>1</sup>Note that the correlation of LO-OOA vs. NO<sub>3</sub> is better for seasonal PMF than rolling PMF (both below 0.5). However, due to the multiple sources of the ACSM-measured NO<sub>3</sub> (e.g., ammonium nitrate and organic nitrates), the criteria of LO-OOA vs. NO<sub>3</sub> cannot be directly applied to evaluate the performance of two PMF.

---

**References:**

1. Cubison, M.J.; Ortega, A.M.; Hayes, P.L.; Farmer, D.K.; Day, D.; Lechner, M.J.; Brune, W.H.; Apel, E.; Diskin, G.S.; Fisher, J.A.; et al. Effects of aging on organic aerosol from open biomass burning smoke in aircraft and laboratory studies. *Atmos. Chem. Phys.* **2011**, *11*, 12049–12064, doi:10.5194/acp-11-12049-2011.
2. Sandradewi, J.; Prévôt, A.S.H.; Szidat, S.; Perron, N.; Alfarra, M.R.; Lanz, V.A.; Weingartner, E.; Baltensperger, U. Using aerosol light absorption measurements for the quantitative determination of wood burning and traffic emission contributions to particulate matter. *Environ. Sci. Technol.* **2008**, *42*, 3316–3323.
3. Carslaw, D.C.; Ropkins, K. openair - An R package for air quality data analysis. *Environ. Model. Soft.* **2012**, *27–28*, 52–61.
